# Supplementary material for: The Principal Salivary Gland Is the Primary Source of Digestive Enzymes in the Saliva of the Brown Marmorated Stink Bug, Halyomorpha halys
Source: Front Physiol. 2019 Oct 11;10:1255. doi: 10.3389/fphys.2019.01255 (PMC6797616; doi:10.3389/fphys.2019.01255)
Supplement: Supplementary file 1 [file Table_1.XLSX]

## Sheet: STB1
Supplementary Table 1: H. halys protease transcripts
Enzyme	Length (AA)	H. halys protease	Top hit species	Length of reference protein (AA)	Accession number	E value		RPKM		signal peptide
							ASG	PSG	Gut
Aminopeptidase-1	900	aminopeptidase M1-like	Halyomorpha halys	900	XP_014284762	0	0.02	0.02	12.24	1_13
Aminopeptidase-2	433	aminopeptidase N	Halyomorpha halys	867	XP_014289318	0	0.01	0	4.89	undetermined
Aminopeptidase-3	442	aminopeptidase N	Halyomorpha halys	867	XP_014289318	0	0.01	0	4.52	1_22
Aminopeptidase-4	660	aminopeptidase N-like	Halyomorpha halys	919	XP_014284771	0	2.65	0.12	0.05	undetermined
Aminopeptidase-5	954	aminopeptidase N-like	Halyomorpha halys	954	XP_014289565	0	2.2	0.06	0.89	No
Aminopeptidase-6	874	aminopeptidase N-like	Halyomorpha halys	891	XP_014273619	0	6.64	3.85	0.26	1_16
Aminopeptidase-7	941	aminopeptidase N-like	Halyomorpha halys	757	XP_014284768	0	13.36	7.66	2773.34	1_17
Aminopeptidase-8	257	aminopeptidase N-like	Halyomorpha halys	919	XP_014284771	9.95831e-173	1.14	0.12	0.03	undetermined
Aminopeptidase-9	917	aminopeptidase N-like isoform X1	Halyomorpha halys	948	XP_014280241	0	37.95	30.63	5.61	undetermined
Aminopeptidase-10	578	aminopeptidase N-like isoform X2	Halyomorpha halys	929	XP_014280242	0	51.71	40.71	5.31	undetermined
Aminopeptidase-11	313	aminopeptidase N-like isoform X3	Halyomorpha halys	910	XP_014280243	0	0.06	1.24	2.83	undetermined
Aminopeptidase-12	167	cytosol aminopeptidase-like	Halyomorpha halys	536	XP_014280262	6.55402e-114	0	0.1	2.8	undetermined
Aminopeptidase-13	258	cytosol aminopeptidase-like isoform X2	Halyomorpha halys	451	XP_014278784	7.2983e-172	0.04	0	3.29	undetermined
Aminopeptidase-14	519	cytosol aminopeptidase-like, partial	Halyomorpha halys	447	XP_014274989	0	21.5	7.48	38.97	no
Aminopeptidase-15	924	glutamyl aminopeptidase-like	Halyomorpha halys	927	XP_014271442	0	9.3	4.02	20.31	1_30
Aminopeptidase-16	907	glutamyl aminopeptidase-like isoform X1	Halyomorpha halys	920	XP_014289058	0	8.32	2.12	17.9	No
Aminopeptidase-17	155	glutamyl aminopeptidase-like isoform X3	Halyomorpha halys	853	XP_014289060	8.93626e-66	0.19	0	1.89	undetermined
Aminopeptidase-18	127	leucyl-cystinyl aminopeptidase-like isoform X1	Halyomorpha halys	354	XP_014284769	1.2427e-86	4.5	0.82	1871.05	undetermined
Aminopeptidase-19	111	leucyl-cystinyl aminopeptidase-like isoform X2	Halyomorpha halys	354	XP_014284770	1.1867e-71	3.6	0.6	1267.31	undetermined
Aminopeptidase-20	378	methionine aminopeptidase 1 isoform X1	Halyomorpha halys	378	XP_014291140	0	9.48	6.89	22.97	no
Aminopeptidase-21	462	methionine aminopeptidase 2	Halyomorpha halys	476	XP_014283008	0	11.01	5.1	6.89	no
Aminopeptidase-22	295	probable aminopeptidase NPEPL1	Halyomorpha halys	507	XP_014278140	0	16.4	1.38	2.51	undetermined
Aminopeptidase-23	507	probable aminopeptidase NPEPL1	Halyomorpha halys	507	XP_014278140	0	49.17	11.03	39.85	no
Aminopeptidase-24	508	probable Xaa-Pro aminopeptidase 3 isoform X1	Halyomorpha halys	507	XP_014270651	0	14.08	2.46	6.17	no
Aminopeptidase-25	164	probable Xaa-Pro aminopeptidase 3 isoform X2	Halyomorpha halys	398	XP_014270652	1.21801e-116	16.17	2.68	5.9	undetermined
Aminopeptidase-26	140	probable Xaa-Pro aminopeptidase P	Halyomorpha halys	611	XP_014270246	6.70695e-95	0.57	0	0	undetermined
Aminopeptidase-27	950	puromycin-sensitive aminopeptidase	Halyomorpha halys	871	XP_014280488	0	14.81	12.2	52.89	no
Aminopeptidase-28	453	putative aminopeptidase W07G4.4	Halyomorpha halys	514	XP_014294688	0	98.7	20.51	220.57	undetermined
Aminopeptidase-29	516	putative aminopeptidase W07G4.4 isoform X2	Halyomorpha halys	516	XP_014294687	0	51.51	35.43	196.7	no
Aminopeptidase-30	599	xaa-Pro aminopeptidase 1 isoform X1	Halyomorpha halys	615	XP_014289284	0	20.86	7.12	86.58	no
Aminopeptidase-31	106	xaa-Pro aminopeptidase 1-like	Halyomorpha halys	689	XP_014271038	2.50528e-67	0.49	0	0	undetermined
Aminopeptidase-32	810	alanine/arginine aminopeptidase-like	Papilio xuthus	634	XP_013163939	0	16.44	7.06	2.41	undetermined
Aminopeptidase-33	737	aminopeptidase 2-like	Papilio xuthus	832	XP_013174264	0	1.9	0.62	0.37	undetermined
Aminopeptidase-34	574	probable Xaa-Pro aminopeptidase P	Papilio xuthus	520	XP_013181831	0	5.26	2.37	1.17	undetermined
Aminopeptidase-35	225	leucyl aminopeptidase	Candidatus Pantoea carbekii	522	WP_082085722	5.71382e-150	0	0	0.57	undetermined
Aminopeptidase-36	244	leucyl aminopeptidase	Candidatus Pantoea carbekii	522	WP_082085722	2.11351e-167	0	0	0.62	undetermined
Aminopeptidase-37	259	type I methionyl aminopeptidase	Candidatus Pantoea carbekii	260	WP_046201243	3.13485e-175	0	0	2.07	undetermined
Aminopeptidase-38	113	Xaa-Pro aminopeptidase	Candidatus Pantoea carbekii	440	WP_022564130	6.46544e-68	0	0	0.68	undetermined
Aminopeptidase-39	104	Xaa-Pro aminopeptidase	Candidatus Pantoea carbekii	440	WP_022564130	4.25879e-44	0	0	0.23	undetermined
Aminopeptidase-40	159	Xaa-Pro aminopeptidase	Candidatus Pantoea carbekii	440	WP_022564130	7.31615e-93	0	0	0.43	undetermined
Aminopeptidase-41	484	cytosol aminopeptidase	Nosema bombycis CQ1	505	EOB14027	0	24.66	10.95	4.54	undetermined
Aminopeptidase-42	162	M1 family aminopeptidase 1	Nosema bombycis CQ1	355	EOB14095	1.20092e-106	15.4	7.49	2.6	undetermined
Aminopeptidase-43	607	x-prolyl aminopeptidase 2	Nosema ceranae	602	KKO76399	0	36.18	9.28	2.66	no
Aminopeptidase-44	340	Methionine aminopeptidase 2	Nosema bombycis CQ1	358	EOB11465	0	9.46	3.94	2.25	undetermined
Peptidase -1	222	alpha-aspartyl dipeptidase	Halyomorpha halys	247	XP_014280468	2.53336e-147	20.17	3.26	22.62	1_19
Peptidase -2	247	alpha-aspartyl dipeptidase	Halyomorpha halys	247	XP_014280468	1.15632e-180				no
Peptidase -3	482	cytosolic non-specific dipeptidase	Halyomorpha halys	482	XP_014287831	0	13.76	8.16	187.36	no
Peptidase -4	483	carboxypeptidase B-like	Halyomorpha halys	483	XP_014287173	0	2.08	0	0.17	1_20
Peptidase -5	412	carboxypeptidase B-like	Halyomorpha halys	412	XP_014275318	0	27.41	5081.11	4.62	1_20
Peptidase -6	181	carboxypeptidase B-like	Halyomorpha halys	418	XP_014275317	1.02909e-115	1.13	0.72	0.27	undetermined
Peptidase -7	159	carboxypeptidase B-like	Halyomorpha halys	418	XP_014275317	4.65478e-112	0.8	0.26	0.18	undetermined
Peptidase -8	339	carboxypeptidase B-like	Halyomorpha halys	339	XP_014289166	0	343.12	1.47	1.22	1_21
Peptidase -9	413	carboxypeptidase B-like	Halyomorpha halys	408	XP_014277059	2.53995e-155	3.16	522.1	0.48	1_24
Peptidase -10	1355	carboxypeptidase D-like	Halyomorpha halys	1355	XP_014292379	0	9.04	6.3	13.35	1_20
Peptidase -11	328	carboxypeptidase E-like	Halyomorpha halys	480	XP_014284584	0	0.35	0.25	1.95	undetermined
Peptidase -12	472	carboxypeptidase M isoform X1	Halyomorpha halys	472	XP_014271974	0	18.07	1.24	1.71	1_27
Peptidase -13	461	carboxypeptidase M isoform X3	Halyomorpha halys	461	XP_014271976	0	16.93	1.1	1.66	1_27
Peptidase -14	419	carboxypeptidase M-like isoform X1	Halyomorpha halys	547	XP_014280218	0	31.29	4.07	2.32	1_26
Peptidase -15	120	carboxypeptidase M-like isoform X2	Halyomorpha halys	545	XP_014280219	3.54275e-64	64.89	14.3	3.95	no
Peptidase -16	161	carboxypeptidase N subunit 2-like, partial	Halyomorpha halys	290	XP_014291690	3.71492e-103	0.55	0	0.04	undetermined
Peptidase -17	480	carboxypeptidase Q-like	Halyomorpha halys	480	XP_014278506	0	5.18	0.84	5.26	1_29
Peptidase -18	322	carboxypeptidase Y-like	Halyomorpha halys	320	XP_014273743	2.2616e-130	180.99	89.77	196.79	no
Peptidase -19	630	cytosolic carboxypeptidase-like protein 5 isoform X1	Halyomorpha halys	715	XP_014276545	0	3.23	1.36	4.32	no
Peptidase -20	702	cytosolic carboxypeptidase-like protein 5 isoform X2	Halyomorpha halys	712	XP_014276546	0	2.99	1.46	3.96	no
Peptidase -21	627	cytosolic carboxypeptidase-like protein 5 isoform X7	Halyomorpha halys	637	XP_014276552	0				no
Peptidase -22	106	LOW QUALITY PROTEIN: cytosolic carboxypeptidase 2-like	Halyomorpha halys	1039	XP_014270394	6.07763e-64	1.7	1.28	0.24	undetermined
Peptidase -23	468	lysosomal Pro-X carboxypeptidase	Halyomorpha halys	468	XP_014272640	0	5.24	0.63	125.12	1_15
Peptidase -24	709	probable cytosolic oligopeptidase A	Halyomorpha halys	710	XP_014287509	0	12.12	1.92	10.95	no
Peptidase -25	748	prolyl endopeptidase isoform X1	Halyomorpha halys	748	XP_014275954	0	17.92	5.33	27.03	no
Peptidase -26	705	prolyl endopeptidase isoform X3	Halyomorpha halys	705	XP_014275956	0				no
Peptidase -27	502	xaa-Pro dipeptidase isoform X1	Halyomorpha halys	502	XP_014270423	0	36.99	13.36	145.19	no
Peptidase -28	277	venom serine carboxypeptidase-like	Halyomorpha halys	455	XP_014275800	0	1.46	0.03	0	undetermined
Peptidase -29	124	venom serine carboxypeptidase-like	Halyomorpha halys	455	XP_014275800	3.36821e-81	0.49	0	0	undetermined
Peptidase -30	311	venom serine carboxypeptidase-like	Halyomorpha halys	453	XP_014278748	2.37158e-94	0.26	0.05	49.9	undetermined
Peptidase -31	208	venom serine carboxypeptidase-like	Halyomorpha halys	461	XP_014280068	1.01344e-137	0.11	0	0.16	1_19
Peptidase -32	461	venom serine carboxypeptidase-like	Halyomorpha halys	461	XP_014280068	0	2.87	0.38	31.87	1_19
Peptidase -33	436	venom serine carboxypeptidase-like	Halyomorpha halys	472	XP_014280828	0	9.9	2.28	1.42	undetermined
Peptidase -34	452	venom serine carboxypeptidase-like	Halyomorpha halys	452	XP_014279214	0	6.36	0.13	0.32	1_19
Peptidase -35	459	venom serine carboxypeptidase-like	Halyomorpha halys	459	XP_014278763	2.19272e-122	0.71	0.02	173.43	no
Peptidase -36	160	venom serine carboxypeptidase-like	Halyomorpha halys	452	XP_014275801	2.52003e-84	0	0	0.69	undetermined
Peptidase -37	462	venom serine carboxypeptidase-like	Halyomorpha halys	462	XP_014292441	0	0.01	0.04	30.17	1_18
Peptidase -38	633	caseinolytic peptidase B protein homolog	Halyomorpha halys	633	XP_014291431	0	21.13	5.1	14.38	no
Peptidase -39	202	desumoylating isopeptidase 2	Halyomorpha halys	204	XP_014288013	2.60479e-152	1.2	0.48	4.34	no
Peptidase -40	445	dipeptidase 3-like	Halyomorpha halys	445	XP_014276006	4.04622e-73	0.25	0.03	120.45	no
Peptidase -41	825	dipeptidyl peptidase 9 isoform X1	Halyomorpha halys	838	XP_014284748	0	2.92	1.27	8.14	no
Peptidase -42	787	dipeptidyl peptidase 9 isoform X2	Halyomorpha halys	825	XP_014284749	0	4.54	1.78	11.44	undetermined
Peptidase -43	316	probable isoaspartyl peptidase/L-asparaginase GA20639 isoform X1	Halyomorpha halys	333	XP_014276472	0	14.87	3.57	36.44	no
Peptidase -44	193	probable signal peptidase complex subunit 2	Halyomorpha halys	193	XP_014275702	8.22602e-139	75.69	68.87	68.47	No
Peptidase -45	204	pyroglutamyl-peptidase 1	Halyomorpha halys	204	XP_014281135	1.12984e-147	2.62	0.85	2.14	No
Peptidase -46	1303	tripeptidyl-peptidase 2 isoform X1	Halyomorpha halys	1303	XP_014283046	0	20.58	8.16	24.44	No
Peptidase -47	1266	tripeptidyl-peptidase 2 isoform X2	Halyomorpha halys	1284	XP_014283047	0	21.99	9.23	24.32	No
Peptidase -48	815	venom dipeptidyl peptidase 4 isoform X1	Halyomorpha halys	815	XP_014287203	0	18.21	18.05	2.49	No
Peptidase -49	166	venom dipeptidyl peptidase 4 isoform X2	Halyomorpha halys	808	XP_014287204	9.17607e-114	16.23	21.36	3.14	Undetermined
Peptidase -50	798	venom dipeptidyl peptidase 4 isoform X3	Halyomorpha halys	798	XP_014287205	0
Peptidase -51	130	endopeptidase La	Candidatus Pantoea carbekii	778	WP_022564777	1.05729e-75	0	0	1.63	Undetermined
Peptidase -52	231	endopeptidase La	Candidatus Pantoea carbekii	778	WP_022564777	4.48984e-148	0	0	1.89	Undetermined
Peptidase -53	311	endopeptidase La	Candidatus Pantoea carbekii	778	WP_022564777	0	0	0	2.01	Undetermined
Peptidase -54	256	peptidase YeaZ	Candidatus Pantoea carbekii	247	AKC32051	1.24255e-169	0.11	0.04	17.29	Undetermined
Peptidase -55	326	unknown (Peptidase_M22 superfamily)	Nosema bombycis	330	ABO69714	0	2.21	1.09	0.29	Undetermined
Cathepsin-1	335	cathepsin B	Halyomorpha halys	335	XP_014290817	0	276.28	5.53	16.18	1_15
Cathepsin-2	333	cathepsin B-like	Halyomorpha halys	334	XP_014289471	0	38.86	5.17	9063.68	1_16
Cathepsin-3	333	cathepsin B-like	Halyomorpha halys	333	XP_014289457	0				1_16
Cathepsin-4	217	cathepsin B-like	Halyomorpha halys	338	XP_014283241	7.95051e-159	0.02	0.02	2.25	Undetermined
Cathepsin-5	126	cathepsin B-like	Halyomorpha halys	338	XP_014283241	8.53154e-83	0	0	1.58	Undetermined
Cathepsin-6	342	cathepsin B-like isoform X1	Halyomorpha halys	342	XP_014289247	0	0.44	27.38	18.68	No
Cathepsin-7	148	cathepsin B-like isoform X3	Halyomorpha halys	279	XP_014289261	6.36069e-104	0.71	49.88	36.41	Undetermined
Cathepsin-8	391	cathepsin D-like	Halyomorpha halys	228	XP_014291072	3.93829e-163	129.51	41.47	19.21	1_18
Cathepsin-9	372	cathepsin D-like	Halyomorpha halys	372	XP_014291624	4.10772e-180	0.87	0.08	209.08	1_19
Cathepsin-10	390	cathepsin D-like	Halyomorpha halys	390	XP_014270708	0	1.72	0.15	306.58	1_20
Cathepsin-11	384	cathepsin D-like	Halyomorpha halys	384	XP_014278605	0	0	0	3.21	1_20
Cathepsin-12	113	cathepsin L-like	Halyomorpha halys	133	XP_014282096	5.90472e-60	0	0	39.21	Undetermined
Cathepsin-13	262	cathepsin L-like isoform X2	Halyomorpha halys	262	XP_014286296	0	0	0.03	7.52	1_16
Cathepsin-14	324	cathepsin L-like, partial	Halyomorpha halys	300	XP_024219377.1	0	0.09	0.02	85.34	1_15
Cathepsin-15	334	cathepsin L1	Halyomorpha halys	334	XP_014279027	0	487.63	140	37.02	1_16
Cathepsin-16	102	cathepsin L1-like	Halyomorpha halys	329	XP_014282106	3.62378e-67	0.58	0.46	858.61	Undetermined
Cathepsin-17	397	cathepsin L1-like	Halyomorpha halys	399	XP_014282138	0	51.89	3.91	4.85	1_29
Cathepsin-18	341	cathepsin L1-like	Halyomorpha halys	341	XP_014272392	0	5.69	0.86	1490.84	1_19
Cathepsin-19	373	cathepsin L1-like	Halyomorpha halys	359	XP_014290635	0	41.12	0.56	106.06	No
Cathepsin-20	329	cathepsin L1-like	Halyomorpha halys	329	XP_014282105	0	30.89	2.74	4263.22	1_15
Cathepsin-21	326	cathepsin L1-like	Halyomorpha halys	326	XP_014282137	1.24668e-120	9.95	2.37	3927.58	1_15
Cathepsin-22	177	cathepsin L1-like	Halyomorpha halys	326	XP_014282137	7.51724e-106	9.71	3.24	5147.78	Undetermined
Cathepsin-23	322	cathepsin L1-like	Halyomorpha halys	329	XP_014282112	0	15.88	4.65	3600.21	1_15
Cathepsin-24	333	cathepsin L1-like	Halyomorpha halys	333	XP_014292129	0	6.92	5.37	478.82	1_16
Cathepsin-25	333	cathepsin L1-like	Halyomorpha halys	333	XP_014281793	1.50961e-86	18.85	9.5	13836.5	1_19
Cathepsin-26	333	cathepsin L1-like	Halyomorpha halys	333	XP_014273555	0	13.29	6.73	10959.2	1_19
Cathepsin-27	330	cathepsin L1-like	Halyomorpha halys	330	XP_014292127	0	316.34	6.16	1.12	1_17
Cathepsin-28	168	cathepsin L1-like	Halyomorpha halys	332	XP_014281817	3.31433e-119	3.22	1.17	2032.54	1_17
Cathepsin-29	383	cathepsin L1-like	Halyomorpha halys	383	XP_014292125	0	2.83	0.41	844.28	1_16
Cathepsin-30	325	cathepsin L1-like	Halyomorpha halys	325	XP_014293523	0	1.07	0.2	180.75	1_15
Cathepsin-31	325	cathepsin L1-like	Halyomorpha halys	302	XP_014271834	0	1.12	0.01	0.02	No
Cathepsin-32	105	cathepsin L1-like	Halyomorpha halys	281	XP_014282095	2.77154e-67	0	0	14.57	Undetermined
Cathepsin-33	110	cathepsin L1-like	Halyomorpha halys	340	XP_014282110	1.20038e-68	0.07	0	23.44	Undetermined
Cathepsin-34	326	cathepsin L1-like	Halyomorpha halys	326	XP_014286294	0	0.02	0	2.16	1_15
Cathepsin-35	341	cathepsin L1-like	Halyomorpha halys	333	XP_014292126	0	0.12	0.02	5.62	1_24
Cathepsin-36	325	cathepsin L1-like	Halyomorpha halys	325	XP_014291518	0	0.25	0	5.79	1_15
Cathepsin-37	262	cathepsin L1-like isoform X1	Halyomorpha halys	328	XP_014282107	1.4742e-101				1_15
Cathepsin-38	333	cathepsin L1-like isoform X1	Halyomorpha halys	333	XP_014273551	0				1_19
Cathepsin-39	324	cathepsin L1-like isoform X1	Halyomorpha halys	324	XP_014292798	0	2.15	0.36	917.71	1_15
Cathepsin-40	140	cathepsin L1-like isoform X1	Halyomorpha halys	360	XP_014290881	2.92869e-97	0.23	0	18.49	Undetermined
Cathepsin-41	217	cathepsin L1-like isoform X1	Halyomorpha halys	360	XP_014290881	5.06429e-154	0	0	9.02	No
Cathepsin-42	325	cathepsin L1-like isoform X1	Halyomorpha halys	325	XP_014286295	0	0	0.03	7.52	1_16
Cathepsin-43	241	cathepsin L1-like isoform X2	Halyomorpha halys	333	XP_014273552	8.13419e-177	15.19	6.59	11577.2	Undetermined
Cathepsin-44	115	cathepsin L1-like isoform X2	Halyomorpha halys	338	XP_014290892	2.13809e-80	24.42	16.99	18.31	Undetermined
Cathepsin-45	264	cathepsin L1-like isoform X2	Halyomorpha halys	264	XP_014292799	0	0.8	0.17	308.05	1_15
Cathepsin-46	124	cathepsin L1-like isoform X3	Halyomorpha halys	328	XP_014282109	1.35352e-84	0.37	0	188.97	Undetermined
Cathepsin-47	102	cathepsin L1-like isoform X3	Halyomorpha halys	333	XP_014273553	5.18007e-57	0.52	0	20.16	Undetermined
Cathepsin-48	328	cathepsin L1-like, partial	Halyomorpha halys	265	XP_014270212	1.30399e-86	20.63	2.97	83.7	1_19
Cathepsin-49	169	cathepsin L1-like, partial	Halyomorpha halys	265	XP_014270212	1.90209e-115	32.5	4.76	69.03	Undetermined
Cathepsin-50	351	cathepsin O-like	Halyomorpha halys	351	XP_014278021	0	45.13	1.9	10.25	Undetermined
Cathepsin-51	186	cathepsin O-like	Halyomorpha halys	351	XP_014278021	9.89232e-108	16.88	0.24	1.54	No
Cathepsin-52	244	cysteine proteinase 7-like isoform X1	Halyomorpha halys	284	XP_014292130	7.82577e-110	10578.4	18.15	7.58	Undetermined
Cathepsin-53	265	cysteine proteinase 7-like isoform X3 (X1, X2)	Halyomorpha halys	277	XP_014292143	4.29451e-106				Undetermined
Cathepsin-54	552	digestive cysteine proteinase 1	Halyomorpha halys	552	XP_014283673.1	0	6.75	1.34	847.94	1_19
Cathepsin-55	93	digestive cysteine proteinase 1-like	Halyomorpha halys	93	XP_014273707	7.88672e-62	375.58	6.12	1167.76	1_15
Cathepsin-56	91	digestive cysteine proteinase 2-like isoform X1	Halyomorpha halys	99	XP_014278884	2.27676e-61	165.24	20.85	15.4	1_15
Cathepsin-57	799	putative cysteine proteinase CG12163 isoform X1	Halyomorpha halys	799	XP_014278765	0	71.12	20.7	446.78	1_22
Cathepsin-58	702	putative cysteine proteinase CG12163 isoform X2	Halyomorpha halys	799	XP_014278766	0	4.9	0.63	6	Undetermined
Cathepsin-59	376	cysteine protease ATG4B-like	Halyomorpha halys	376	XP_014280805	0	7.16	3.37	15.84	No
Chymotrypsin-1	265	chymotrypsin-1-like	Halyomorpha halys	303	XP_014274701	3.18287e-70	36.78	7502.07	5.45	Undetermined
Chymotrypsin-2	274	chymotrypsin-1-like	Halyomorpha halys	274	XP_014272491	0	8.37	1586.36	1.17	1_19
Chymotrypsin-3	303	chymotrypsin-1-like	Halyomorpha halys	303	XP_014274702	0	25.01	1809.5	3.19	1_18
Chymotrypsin-4	182	chymotrypsin-like protease CTRL-1	Halyomorpha halys	372	XP_014289092	5.73243e-130	1.38	0.04	0	Undetermined
Chymotrypsin-5	392	chymotrypsinogen B-like	Halyomorpha halys	392	XP_014289643	0	25.46	1.64	4.46	1_17
Trypsin-1	204	trypsin-1 isoform X3	Halyomorpha halys	263	XP_014294192	2.64817e-142	1.34	0.39	0.82	No
Trypsin-2	275	trypsin-1-like	Halyomorpha halys	275	XP_014290737	2.80263e-97	0.77	0.2	268.26	1_20
Trypsin-3	155	trypsin-1-like	Halyomorpha halys	357	XP_014290728	1.12525e-102	0	0	1.04	Undetermined
Trypsin-4	187	trypsin-1-like	Halyomorpha halys	357	XP_014290728	1.49152e-107	0	0	1.13	Undetermined
Trypsin-5	291	trypsin-2-like isoform X1	Halyomorpha halys	291	XP_014276541	0	0.03	0.02	16.98	1_20
Trypsin-6	117	trypsin-4-like	Halyomorpha halys	316	XP_014294197	6.1163e-80	0.61	0.32	0.48	Undetermined
Trypsin-7	191	trypsin-like	Halyomorpha halys	384	XP_014286482	3.89173e-122	15.06	1.56	1.8	Undetermined
Trypsin-8	272	trypsin-like	Halyomorpha halys	384	XP_014286482	1.37248e-131	9.58	0.88	2.27	Undetermined
Trypsin-9	375	trypsin-like	Halyomorpha halys	375	XP_014289649	0	12.88	0.32	2.11	1_20
Trypsin-10	136	serine protease gd-like isoform X1	Halyomorpha halys	432	XP_014288046	2.79632e-58	0.4	1.58	1.87	1_22
Trypsin-11	247	serine protease gd-like isoform X1	Halyomorpha halys	432	XP_014288046	2.11481e-161	0	0	0.95	Undetermined
Trypsin-12	127	serine protease gd-like isoform X2	Halyomorpha halys	378	XP_014288047	5.83379e-62	0.37	1.21	2.45	No
Trypsin-13	263	serine protease snake-like	Halyomorpha halys	247	XP_014286485	1.44007e-159	12.66	0.83	0.4	Undetermined
Trypsin-14	355	serine protease snake-like	Halyomorpha halys	356	XP_014276916	0	16.42	0.33	5.06	1_31
Trypsin-15	115	serine protease snake-like	Halyomorpha halys	218	XP_014285101	9.70595e-79	0.44	0	0	Undetermined
Trypsin-16	185	serine proteinase stubble-like	Halyomorpha halys	181	XP_014291917.1	3e-123	0.52	0	0	No
Trypsin-17	441	serine proteinase stubble	Halyomorpha halys	476	XP_014283220	0	1.13	0	0.03	No
Trypsin-18	180	serine proteinase stubble isoform X2	Halyomorpha halys	365	XP_024214060.1	8.53038e-102	4.34	0.91	1.15	Undetermined
Trypsin-19	408	serine proteinase stubble-like isoform X4	Cimex lectularius	408	XP_014244048	0	17.72	0.06	0.05	Undetermined
Trypsin-20	351	venom protease	Halyomorpha halys	355	XP_014285104.1	0	22.47	3.5	5.93	1_17
Trypsin-22	153	venom serine protease Bi-VSP-like isoform X1	Halyomorpha halys	430	XP_014271279	2.31113e-106	3.49	0.1	0.7	Undetermined
Trypsin-23	308	venom serine protease-like	Halyomorpha halys	331	XP_014286426	1.08337e-101	7.11	912.12	1.96	1_19
Trypsin-24	280	venom serine protease-like	Halyomorpha halys	280	XP_014280682	0	4.42	605.69	0.8	1_16
Trypsin-25	163	venom serine protease-like, partial	Halyomorpha halys	312	XP_014292633	1.91927e-109	0.27	37.26	0	Undetermined
Trypsin-26	490	putative serine protease K12H4.7 isoformX1	Halyomorpha halys	490	XP_014271418	0	12.96	0.61	103.21	1_19
Trypsin-28	383	venom protease-like	Halyomorpha halys	383	XP_014271218	0	4.65	0.41	0.37	1_20
Trypsin-29	361	venom protease-like	Halyomorpha halys	361	XP_014277408	0	62.22	2.71	2.3	1_20
Trypsin-30	360	venom protease-like	Halyomorpha halys	360	XP_014277409	0				1_20
Trypsin-31	385	venom protease-like	Halyomorpha halys	385	XP_014286481	0	93.93	3.83	9.99	1_13
Trypsin-32	340	venom protease-like	Halyomorpha halys	342	XP_014271508	0	17.84	0.98	1.81	1_18
Trypsin-33	102	venom protease-like	Halyomorpha halys	360	XP_014277409	4.10985e-68	8.54	0	0.33	Undetermined
Trypsin-34	243	venom protease-like	Halyomorpha halys	322	XP_014278342	0	0.99	0.47	0.5	1_18
Trypsin-35	377	venom protease-like isoform X1	Halyomorpha halys	377	XP_014285105	0	34.16	0.34	62.06	No
Trypsin-36	309	venom protease-like isoform X2	Halyomorpha halys	365	XP_014285104.1	0	33.98	0.86	3.18	Undetermined
Trypsin-37	385	venom protease-like isoform X2	Halyomorpha halys	373	XP_014285106	0	34.16	0.34	62.06	Undetermined
Trypsin-38	282	venom serine protease	Halyomorpha halys	311	XP_014289625	0	3.61	593.27	1.21	1_19
Trypsin-39	290	venom serine protease-like	Halyomorpha halys	290	XP_014293119	0	9.23	1762.04	1.51	1_16
Trypsin-40	334	venom serine protease-like	Halyomorpha halys	334	XP_014286910	0	14.77	2812.85	2.95	Undetermined
Trypsin-41	417	venom serine protease-like	Halyomorpha halys	417	XP_014292325	0	538.65	11.87	0.82	1_21
Trypsin-42	281	venom serine protease-like	Halyomorpha halys	281	XP_014291671	0	19.03	3550.97	4.37	1_16
Trypsin-43	397	venom serine protease-like	Halyomorpha halys	397	XP_014289432	0	123.02	0.5	0.68	1_30
Trypsin-44	280	venom serine protease34-like	Halyomorpha halys	281	XP_014277254	0	50.78	10209	14.24	1_26
Trypsin-45	271	venom serine protease34-like	Halyomorpha halys	271	XP_014272561	0	65.68	13245.3	12.1	1_17
Trypsin-46	109	venom serine protease34-like	Halyomorpha halys	245	XP_014291670.1	6.01132e-74	1.21	66.27	0.16	Undetermined
Trypsin-47	428	venom serine proteaseBi-VSP-like isoformX2	Halyomorpha halys	428	XP_014271280	0	2.66	0.12	0.68	1_14
Trypsin-48	302	venom serine protease	Halyomorpha halys	302	XP_014292641	0	2266.41	17.2	1.92	1_31
Others-1	436	aspartic proteinase A1-like	Halyomorpha halys	436	XP_014271438	3.40272e-132	0.92	0.33	577.79	1_16
Others-4	384	aspartic proteinase A3-like	Halyomorpha halys	387	XP_014274641	0	12.02	2.07	1575.45	1_19
Others-5	379	aspartic proteinase A3-like isoform X2	Halyomorpha halys	379	XP_014278873	2.19394e-138	0.83	0.11	173.2	No
Others-6	423	aspartic proteinase oryzasin-1-like isoform X1	Halyomorpha halys	423	XP_014290481	0	0.48	0.09	107.57	No
Others-7	407	aspartic proteinase oryzasin-1-like isoform X2	Halyomorpha halys	407	XP_014290482	0				No
Others-8	388	aspartic proteinase-like isoform X1	Halyomorpha halys	388	XP_014274644	0	0.22	0.02	32.9	No
Others-9	389	lysosomal aspartic protease-like	Halyomorpha halys	389	XP_014270710	0	0.07	0	34.21	1_19
Others-10	424	lysosomal aspartic protease	Halyomorpha halys	424	XP_014282604.1	0	153.24	4.17	77.35	1_19
Others-11	730	ADAM17-like protease isoformX1	Halyomorpha halys	730	XP_014283278	0	3.52	0.68	12.41	No
Others-12	237	ATP-dependent Clp protease proteolytic subunit-like	Halyomorpha halys	237	XP_014278032	5.84924e-173	7.65	2.03	12.15	No
Others-13	430	CAAX prenyl protease1 homolog	Halyomorpha halys	430	XP_014272509	0	24.03	10.11	28.28	No
Others-14	284	CAAX prenyl protease2 isoformX1	Halyomorpha halys	284	XP_014287304	0	3.99	0.5	1.34	No
Others-15	802	lon protease homolog2, peroxisomal-like isoformX1	Halyomorpha halys	802	XP_014289734	0	12.32	2.67	23.59	No
Others-16	265	sentrin-specific protease 1-like isoform X3	Halyomorpha halys	650	XP_014279148	4.79232e-170	2.95	1.18	4.78	Undetermined
Others-17	291	sentrin-specific protease 1-like isoform X5	Halyomorpha halys	646	XP_014279150	0	0	0.24	0	Undetermined
Others-18	336	sentrin-specific protease 1-like isoform X6	Halyomorpha halys	610	XP_014279151	0	7.01	2.82	8.92	Undetermined
Others-19	441	sentrin-specific protease 6-like isoform X2	Halyomorpha halys	1081	XP_014277075	0	16.76	8.08	29.55	Undetermined
Others-20	147	sentrin-specific protease 8-like	Halyomorpha halys	214	XP_014284554	6.27383e-102	7.67	2.06	8.58	Undetermined
Others-21	1137	sentrin-specificprotease6-like isoform X1	Halyomorpha halys	1137	XP_014277072	0	1.47	0.16	1.13	No
Others-22	313	sentrin-specificprotease6-like isoform X3	Halyomorpha halys	975	XP_014277076	0				No
Others-23	406	CAAX prenyl protease1 homolog	Papilio xuthus	409	XP_013180923	0	26.31	5.14	1.85	Undetermined
Others-24	445	putative subtilisin-like proteinase 1	Papilio xuthus	492	XP_013161293	0	4.7	1.5	0.37	Undetermined
Others-25	144	sentrin-specific protease1-like	Papilio xuthus	241	XP_013168554	1.91631e-62	6.99	2.81	1.39	Undetermined
Others-26	347	protease SohB	Candidatus Pantoea carbekii	347	WP_022564614	0	0.07	0.05	2.66	Undetermined
Others-27	375	subtilisin-like protease2-2	Nosema bombycis	557	AET97825	2.21835e-118	2.36	0.6	0.24	Undetermined
